# Supplementary material
Source: Springer Nature journal article supplement (https://www.springermedizin.de/resource/supplementary/12883_2010_311_MOESM3_ESM.pdf/9455120)

TIC: 2.4  
S4XC  
28 MAR 08  
09:34:42  
2/3/E/L1/J  
AZM

# A

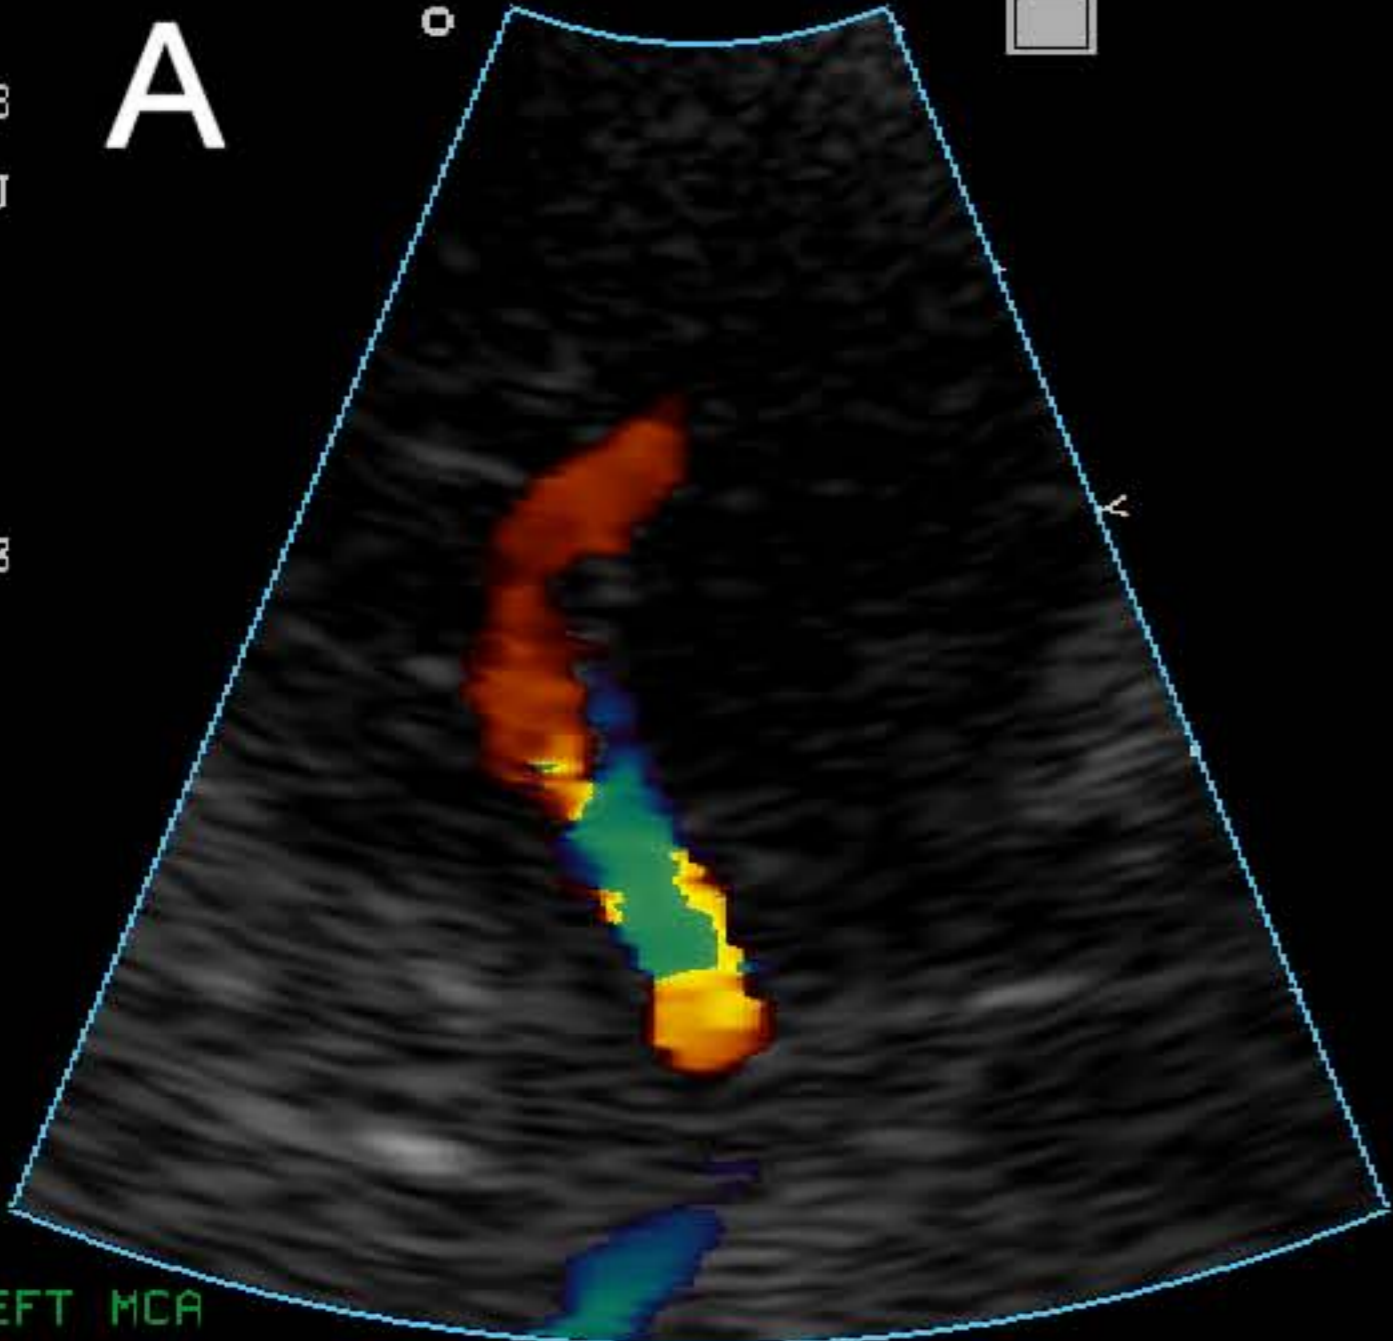

1.8MHZ  
139  
TIC: 1.1  
S4XC  
28 MAR 08  
09:32:23  
2/0/E/L1/J  
AZM

# B

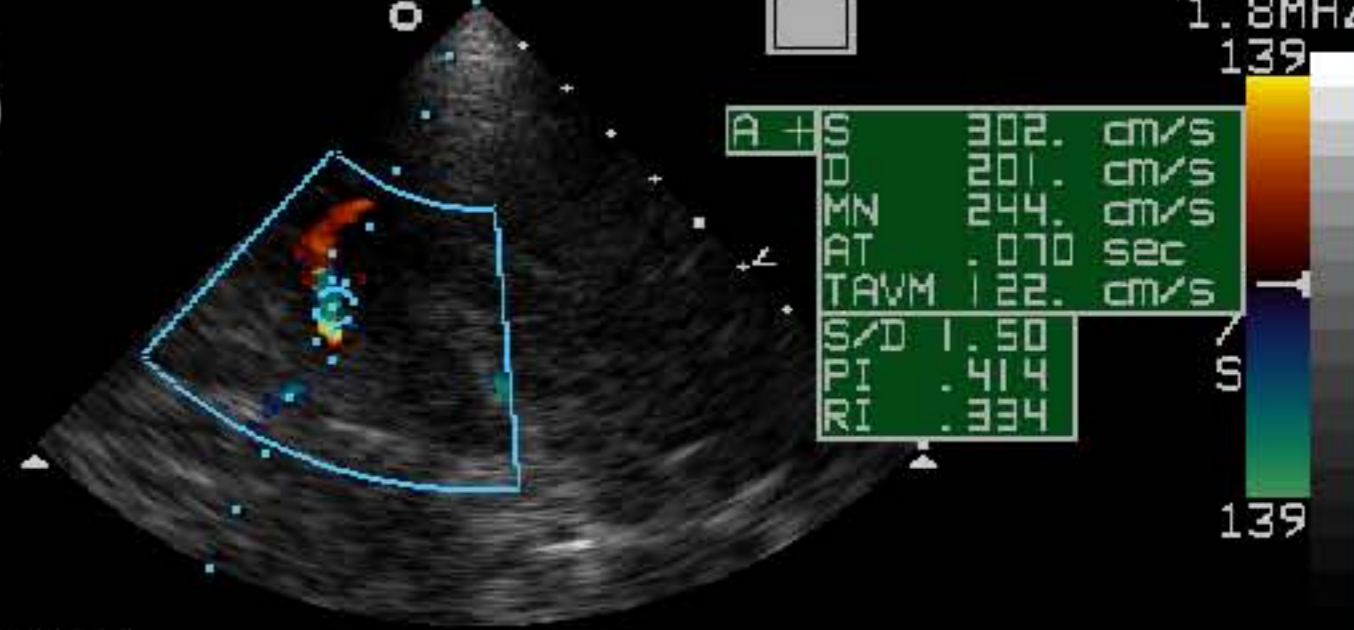

gn  
0:00:53  
GAIN 72  
COMP 70

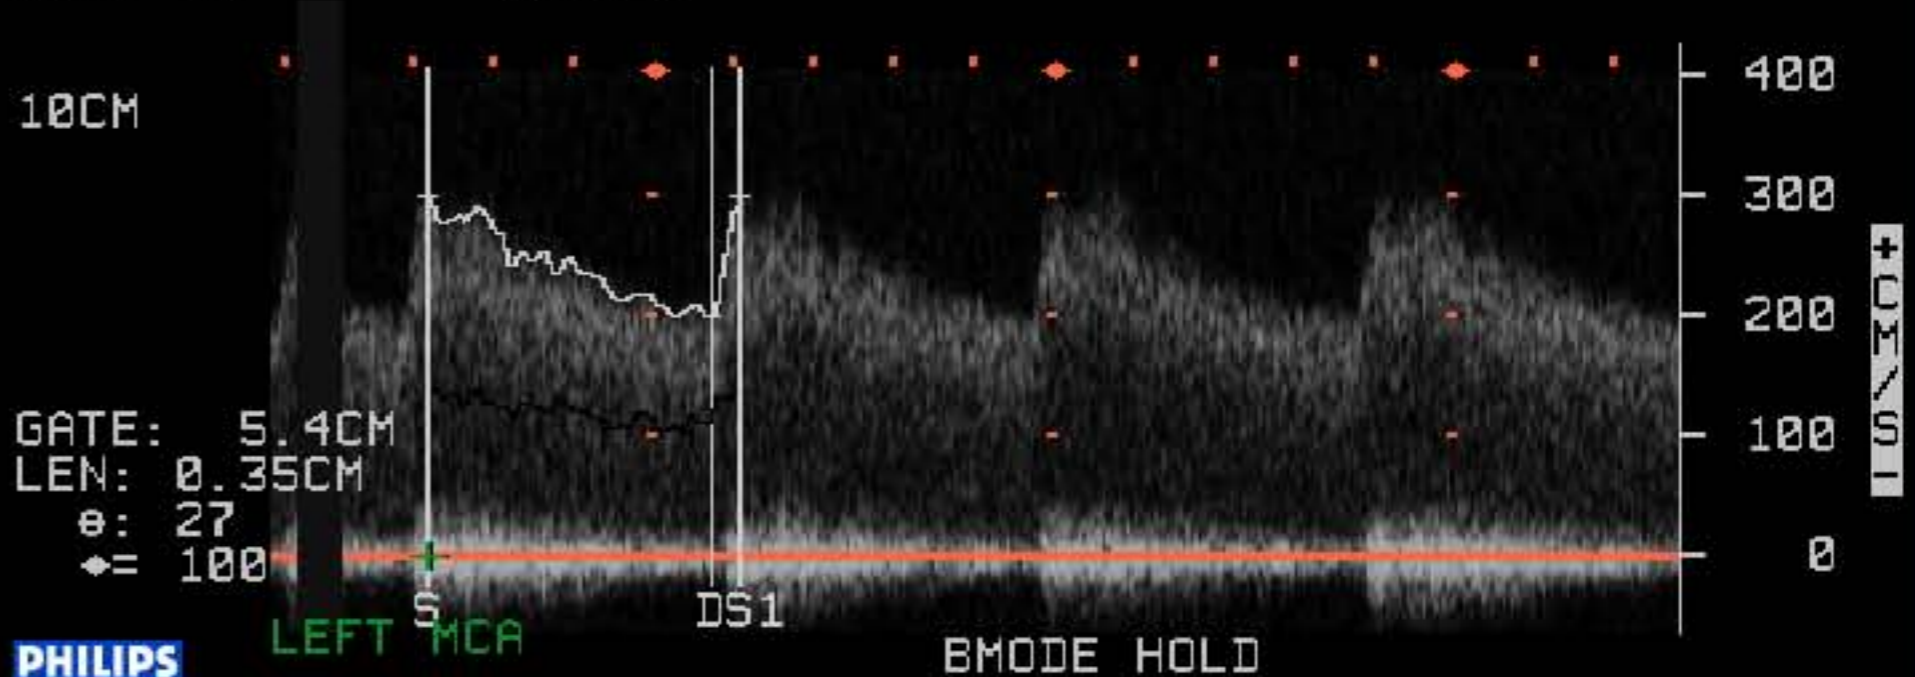

Supplement: MOESM3 [file 9455120]
